# Supplementary material for: Comparison of heat-inactivated and infectious SARS-CoV-2 across indoor surface materials shows comparable RT-qPCR viral signal intensity and persistence
Source: PubMed Central journal article supplement — bioRxiv. 2021 Jul 19:2021.07.16.452756. Preprint. [Version 1] doi: 10.1101/2021.07.16.452756 (PMC8312891; doi:10.1101/2021.07.16.452756), 2021-07-19
Supplement: NIHPP2021.07.16.452756V1-supplement-1.pdf [file NIHPP2021.07.16.452756V1-supplement-1.pdf]

149 Table S1: Statistically significant pairwise comparisons.

| Surface Type             | steel | vinyl | MFP  | acrylic [infect.] | acrylic | glass | ceramic tile | painted drywall | carpet (olefin) [infect.] | carpet (olefin) | carpet (polyester) |
|--------------------------|-------|-------|------|-------------------|---------|-------|--------------|-----------------|---------------------------|-----------------|--------------------|
| steel                    | n.s.  |       |      |                   |         |       |              |                 |                           |                 |                    |
| vinyl                    | n.s.  | n.s.  |      |                   |         |       |              |                 |                           |                 |                    |
| MFP                      | n.s.  | n.s.  | n.s. |                   |         |       |              |                 |                           |                 |                    |
| acrylic [live]           | n.s.  | n.s.  | n.s. | n.s.              |         |       |              |                 |                           |                 |                    |
| acrylic                  | n.s.  | n.s.  | n.s. | n.s.              | n.s.    |       |              |                 |                           |                 |                    |
| glass                    | n.s.  | n.s.  | n.s. | n.s.              | n.s.    | n.s.  |              |                 |                           |                 |                    |
| ceramic tile             | **    | n.s.  | n.s. | n.s.              | n.s.    | n.s.  | n.s.         |                 |                           |                 |                    |
| painted drywall          | **    | n.s.  | **   | **                | **      | n.s.  | n.s.         | n.s.            |                           |                 |                    |
| carpet (olefin)          | **    | **    | **   | **                | **      | **    | **           | **              | n.s.                      |                 |                    |
| carpet (olefin)[infect.] | **    | **    | **   | **                | **      | n.s.  | **           | **              | n.s.                      | n.s.            |                    |
| carpet (polyester)       | **    | **    | **   | **                | **      | **    | **           | **              | n.s.                      | n.s.            | n.s.               |

150 *Table S1: Statistically significant differences from pairwise Mann-Whitney U tests*  
 151 *between ranked values of average Cq from viral gene calls grouped by surface type*  
 152 *after correction for multiple comparisons (FDR-Benjamin/Hochberg, alpha = 0.005) \*\**  
 153 *(n.s.=Not Significant)*

188 **Figure S1**

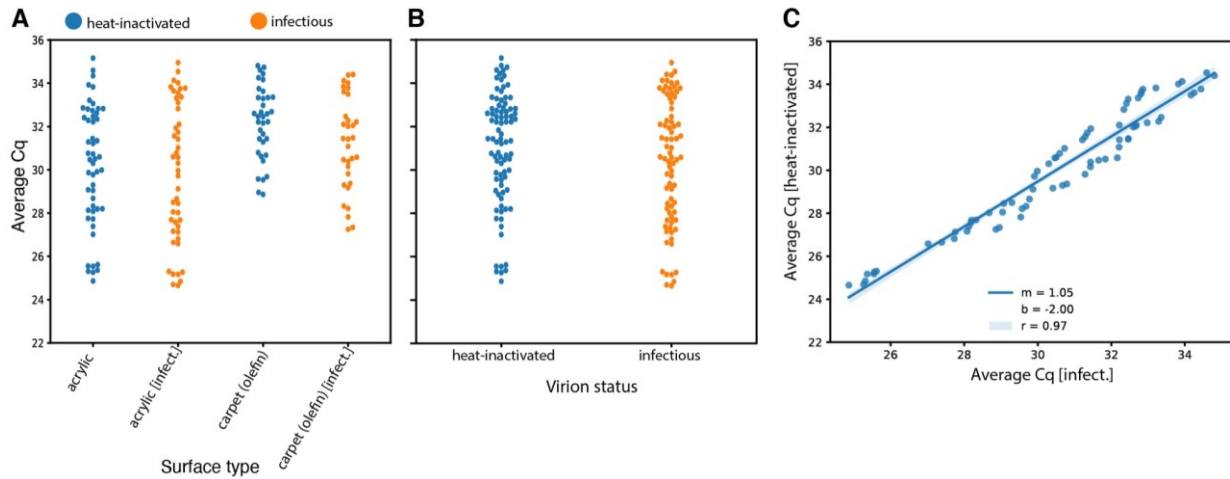

189 *Figure S1. (A) Swarm-plot showing distribution of average Cq of viral gene calls for*  
190 *acrylic and carpet (olefin) surfaces for both heat-inactivated and infectious samples. (B)*  
191 *Swarm plot comparing distribution of average Cq of viral gene class for heat-inactivated or*  
192 *infectious samples. (C) Linear regression on Cqs from paired samples between heat-*  
193 *inactivated and infectious samples.*

196
